# Supplementary material
Source: MDPI journal article supplement (https://www.mdpi.com/2311-7524/9/2/144)
Supplement: s1 [file s1]

**Table S1: Morphological, anatomical, and chemical characters used for principal coordinate analysis.**

|    | <b>Characters</b>                                                                                | <i>F. turcica</i> | <i>F. latialata</i> | <i>F. szowitsiana</i> | <i>F. persica</i> | <i>F.drudeana</i> |
|----|--------------------------------------------------------------------------------------------------|-------------------|---------------------|-----------------------|-------------------|-------------------|
| 1  | Stem, less than 70cm (0); more than 70 (1)                                                       | 1                 | 1                   | 0                     | 1                 | 1                 |
| 2  | Ultimate segment of the leaf, Regular deeplobed (0); Regular lobed (1); linear-setaceous (2).    | 0                 | 1                   | 1                     | 0                 | 2                 |
| 3  | Hair, densely puberulent (0); puberulent (1); setulose-puberulent (2); pubescent (3).            | 0                 | 1                   | 2                     | 3                 | 1                 |
| 4  | Ray numbers, less than 13 (0); 13-15 (1); more than 15 (2).                                      | 2                 | 1                   | 0                     | 2                 | 2                 |
| 5  | Umbellules numbers, less than 12 (0); more than 12(1).                                           | 0                 | 0                   | 0                     | 1                 | 1                 |
| 6  | Pedicele at fruiting, 0.3-0.5 cm (0); 0.5-1.4 cm (1).                                            | 1                 | 1                   | 0                     | ?                 | 1                 |
| 7  | Petals, glabrous (0); hairy (1).                                                                 | 1                 | 1                   | 1                     | 1                 | 0                 |
| 8  | Central umbella, sessile (0); peduncled (1); sessile or peduncled (0,1).                         | 1                 | 1                   | 0,1                   | 0                 | 1                 |
| 9  | Shape of fruit, elliptic (0); elliptic to oblong (1); elliptic to orbicular (2); ovoid (3).      | 0                 | 0                   | 1                     | 1                 | 1                 |
| 10 | Lateral wings, 0.5-1 mm (0); 1- 2mm (0); more than 2mm (2).                                      | 1                 | 2                   | 2                     | 0                 | 0                 |
| 11 | Dorsal vittae per vallecule, 2-3 (0); 3-6 (1); up to 7 (3).                                      | 2                 | 1                   | 1                     | 2                 | 0                 |
| 12 | Commisural vittae number, less than 14 (0); more than 14 (1).                                    | 0                 | 0                   | 0                     | 1                 | 0                 |
| 13 | Width of fruit average, less than 10mm (0); more than 10mm (1).                                  | 0                 | 1                   | 1                     | 0                 | 0                 |
| 14 | Length of fruit average, less than 12mm (0); more than 12mm (1).                                 | 0                 | 1                   | 1                     | 0                 | 0                 |
| 15 | Ratio of length to width of fruit, 1.4 (0); 1.6 (1); 1.8 (2); 2.4 (3)                            | 1                 | 0                   | 0                     | 2                 | 3                 |
| 16 | Habitat, salty slopes (0); dry slopes (1); eroded slopes (2); dry slopes and salty slopes (0,1). | 0                 | 0                   | 0,1                   | 1                 | 2                 |
| 17 | Farnesiferol A, absence (0); presence (1).                                                       | 1                 | 0                   | 0                     | 0                 | 0                 |
| 18 | Badrakemin acetate, absence (0); presence (1).                                                   | 1                 | 1                   | 0                     | 0                 | 1                 |
| 19 | Conferol, absence (0); presence (1).                                                             | 0                 | 1                   | 0                     | 1                 | 1                 |
| 20 | Kellerin, absence (0); presence (1).                                                             | 1                 | 0                   | 1                     | 0                 | 0                 |
| 21 | Gummosin, absence (0); presence (1).                                                             | 1                 | 0                   | 1                     | 1                 | 0                 |

| Axis | Eigenvalue | Percent   |
|------|------------|-----------|
| 1    | 0,30824    | 47,856    |
| 2    | 0,18367    | 28,515    |
| 3    | 0,12544    | 19,475    |
| 4    | 2,1397E-17 | 3,322E-15 |

|                           | Coord 1   | Coord 2  | Coord 3 | Coord 4 |
|---------------------------|-----------|----------|---------|---------|
| <i>Ferula turcica</i>     | -0,034349 | 0,060921 | -0,8818 | 0,44721 |
| <i>Ferula latialata</i>   | -0,24991  | 0,57414  | 0,18453 | 0,44721 |
| <i>Ferula szowitsiana</i> | -0,67735  | -0,31275 | 0,29127 | 0,44721 |
| <i>Ferula persica</i>     | 0,39357   | -0,66953 | 0,10043 | 0,44721 |
| <i>Ferula drudeana</i>    | 0,56804   | 0,34723  | 0,3056  | 0,44721 |

|   |           |         |
|---|-----------|---------|
| 5 | -0,026759 | -4,1545 |
|---|-----------|---------|
